# Supplementary material for: Estrogen receptors in granulosa cells govern meiotic resumption of pre-ovulatory oocytes in mammals
Source: PubMed Central journal article supplement (PMC5386574; doi:10.1038/cddis.2017.82), 2017-03-09
Supplement: cddis201782x1.pdf [file cddis201782x1.pdf]

# **Supplemental Material**

**Wei Liu, et al.**

**Estrogen receptors in granulosa cells govern meiotic resumption of pre-ovulatory oocytes in mammals**

**Supplementary Information**

**Supplementary Figure Legends**

**Figures S1-S7**

**Supplementary Tables**

**Tables S1-S3**

**Supplementary References**

## Supplementary Information

**Estrous cycle monitoring.** Vaginal cells from 6 to 8 weeks female mice were collected by daily saline wash and analyzed for identification of estrous cycle stage as previously described.<sup>1</sup> Only those females displaying at least two successive 4- or 5-day vaginal cycles were used for the experiments.

**Collection of plasma and follicular fluid.** Blood samples from adult female mice at different estrous cycles were collected into 1.5 ml centrifuge tubes containing 7.5% EDTA and 0.6 TIU/ml aprotinin. After collection, tubes were gently rocked several times for anti-coagulation immediately, and then centrifuged at 1 600 g for 15 min at 4 °C. Follicular fluid samples were collected into 35 mm Petri dishes containing 0.4 ml normal saline and 0.6 TIU/ml aprotinin by puncturing the follicles from adult mice at different estrous cycles or prepubertal mice stimulated with 5 IU pregnant mare's serum gonadotropin (PMSG) followed at 48 h later with 5 IU human chorionic gonadotropin (hCG). Liquid and ovarian fragments were then transferred into 1.5 ml centrifuge tubes and centrifuged at 3 000 rpm for 15 min at 4 °C. After centrifugation, plasma and follicular fluid in the supernatant were collected and stored at -80 °C for radioimmunoassay (RIA) analysis.

**RIA.** The amount of NPPC protein present in plasma and follicular fluid was measured by RIA kit (RK-012-03, PHOENIX BIOTECH, Hubei, China). Synthetic CNP-22 (0-1280 pg/ml) was used as a standard. A standard curve was constructed using a log-linear curve fit with B/B<sub>0</sub> (%) (y-axis, where B is the average cpm of the paired standards and B<sub>0</sub> is the cpm of total activity) against NPPC concentration (x-axis). Values were normalized to the amount of protein (pg) present in the samples.

## Supplementary Figure Legends

**Figure S1. Expression of ER $\alpha$  and ER $\beta$  in pre-ovulatory follicles.** Ovaries were harvested from 22- to 24-day-old mice stimulated by PMSG for 48 h and analyzed by immunohistochemistry staining with antibodies to ER $\alpha$  or ER $\beta$ . ER $\alpha$  protein was expressed in theca cells (indicated by arrows), mural granulosa cells (MGCs, indicated by \*) and cumulus cells (CCs, indicated by triangle) of pre-ovulatory follicles. ER $\beta$  staining was predominantly observed in MGCs and CCs of pre-ovulatory follicles. An isotype-matched IgG was used as the negative control. The criteria for classification of follicles were applied as previous reported.<sup>2</sup> Scale bars: 100  $\mu$ m.

**Figure S2. Gonadotropins regulate NPPC and NPR2 levels *in vivo*.** (A and B) *Nppc* and *Npr2* mRNA levels in 22- to 24-day-old mouse ovaries, which were stimulated with PMSG for 0, 24 or 48 h, and at 48 h, some having been injected with hCG for 2 or 4 h. n=3. (C) RIA analysis of NPPC protein levels (pg/ml) in follicular fluid from 22- to 24-day-old mice, which were stimulated with PMSG and followed at 48 h later with hCG. n=7. (D) NPPC protein levels (pg/ml) in mouse follicular fluid from adult mice at different estrous cycles. NPPC protein levels exhibited estrous cycle-dependent variations with maximal expression at proestrus (when FSH production is highest) compared with the relative sustained levels in plasma. P, proestrus; E, estrus; M, metestrus; D, diestrus. \*\*, p < 0.01 vs. follicular fluid group in proestrus group (t-test). n=6.

Data represent the mean  $\pm$  SEM. Different letters (a-e) indicate significant differences between groups (p < 0.05, ANOVA and Holm-Šidák test) in profiles in (A-C).

**Figure S3. Effects of E2 on *Npr2* mRNA levels in MGCs isolated from WT and ERKO mice by RT-qPCR.** MGCs, which were isolated from 22- to 24-day-old mice following PMSG stimulation for 46 to 48 h, were cultured in medium without (control) or with 0.1  $\mu$ M E2 for 24 h *in vitro*. E2-elevated *Npr2* mRNA levels in WT mice were severely compromised in ERKO mice. Data represent the mean  $\pm$  SEM, \*\*, p < 0.01 (t-test). n = 4.

**Figure S4.  $\beta$ ERKO and  $\alpha\beta$ ERKO mice show an attenuated ovarian responsiveness to FSH/PMSG.** Ovarian volume, weight and numbers of large antral follicles and isolated COCs in each ovary from 22- to 24-day-old  $\beta$ ERKO (A) and  $\alpha\beta$ ERKO (B) mice treated with PMSG for 46 to 48 h were significantly decreased. Ovarian volume was approximated by the equation  $V = \text{long diameter} \times \text{short diameter}^2$ .<sup>3</sup> Average ovarian diameter was determined under a graduated stereomicroscope. Ovarian weight was

manifested as wet weight. Data represent the mean  $\pm$  SEM. \*,  $p < 0.05$  and \*\*\*,  $p < 0.001$  (t-test).  $n=12$ .  
Scale bars: 2 mm.

**Figure S5. Putative binding sites of *Nppc* and *Npr2* promoter sequences for ER $\alpha$  and ER $\beta$ .** Putative binding sites were analyzed using the TRANS-FACV® gene tool software (<http://www.gene-regulation.com>).<sup>4</sup> Each rectangle denotes 200 bp. Red rectangles are *Nppc* or *Npr2* promoter binding sequences for ER $\alpha$  or ER $\beta$ . (A) The putative binding sites of *Nppc* and *Npr2* promoter sequences for ER $\alpha$ . (B) The putative binding sites of *Nppc* and *Npr2* promoter sequences for ER $\beta$ .

**Figure S6. Expression of ER $\alpha$ /ER $\beta$  and *Nppc*/*Npr2* mRNA levels in COV434 cell line.** (A) Immunofluorescence analysis of ER $\alpha$  and ER $\beta$  (red) expression in COV434 cells transfected with empty vector for 48 h. The nuclei were stained as blue by hoechst. Scale bars: 25  $\mu$ m. (B) Expression of *Nppc* and *Npr2* mRNA levels in COV434 cells transfected with empty vector. Cells were cultured in medium without (control) or with 0.1  $\mu$ M E2 for 24 h. Data represent the mean  $\pm$  SEM.  $n=3$ .

**Figure S7. FSH promotes oocyte meiotic resumption by decreasing ER levels *in vitro*.** (A) FSH promoted oocyte meiotic resumption (referred to as GVB) in follicles. Follicles were cultured for 4 h in medium containing 0.0-0.1 IU/ml FSH. At least 30 follicles were assessed in each group. \*\*,  $p < 0.01$  vs. Con..  $n=3$ . (B) FSH and LH decreased ER $\alpha$  and ER $\beta$  (green) protein levels in follicles after a culture of 4 h. The nuclei were stained as red by propidium iodide (PI). Scale bars: 100  $\mu$ m. (C) FSH induced oocyte maturation in COCs, which was suppressed by NPPC alone or plus E2. COCs were cultured for 24 h.  $n=4$ . (D) FSH decreased *Esr1* and *Esr2* mRNA levels in COCs after a culture of 24 h. *Esr1* and *Esr2* are the corresponding gene names of ER $\alpha$  and ER $\beta$ .  $n=3$ . (E) FSH decreased *Npr2* mRNA levels in COCs after a culture of 24 h, even when E2 was added.  $n=3$ .

Data represent the mean  $\pm$  SEM. FSH, 0.1 IU/ml; LH, 1.0  $\mu$ g/ml; E2, 0.1  $\mu$ M; Con., Control. Different letters (a-c) indicate significant differences between groups ( $p < 0.05$ , ANOVA and Holm-Šidák test) in profiles in (C-E).

**Figure S1**

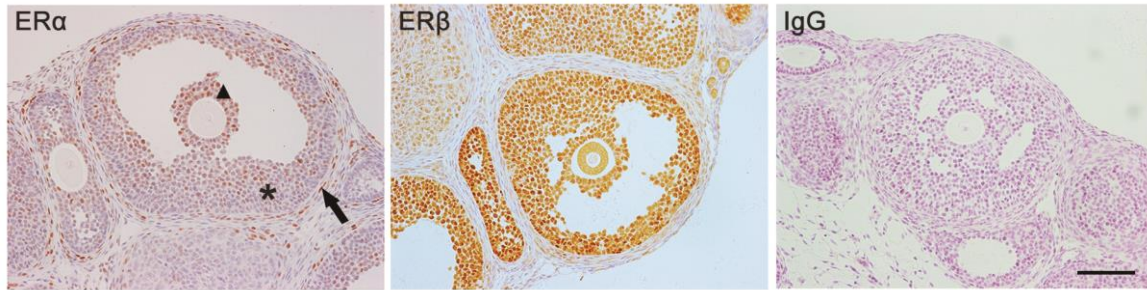

Figure S2

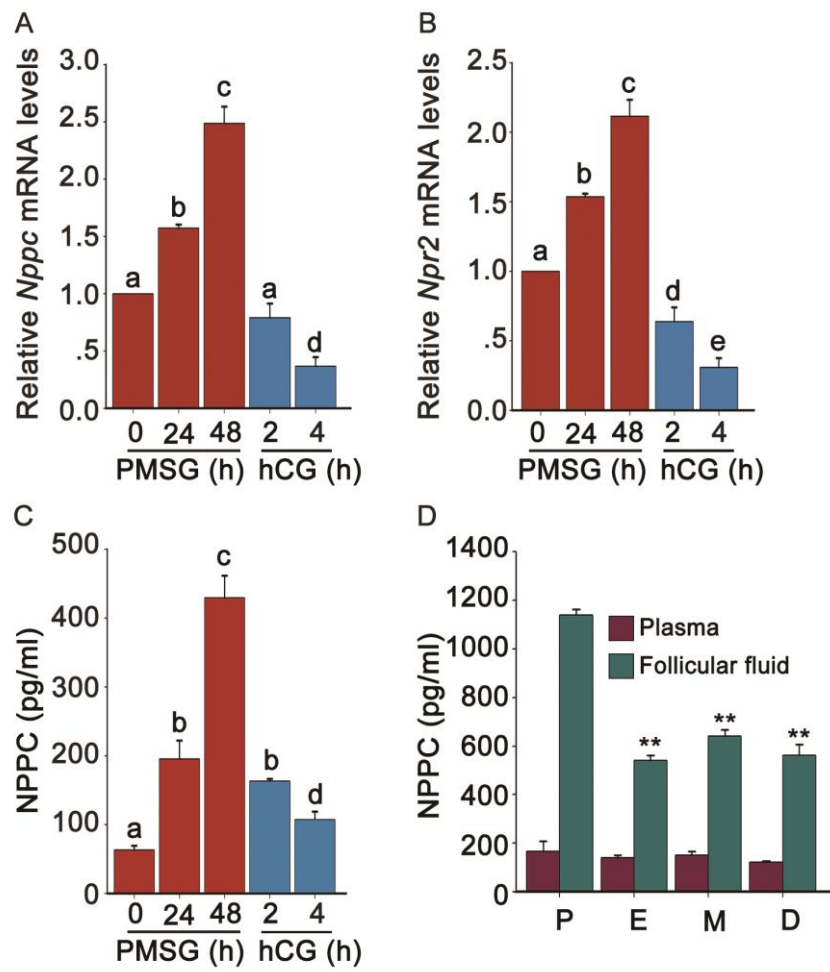

Figure S3

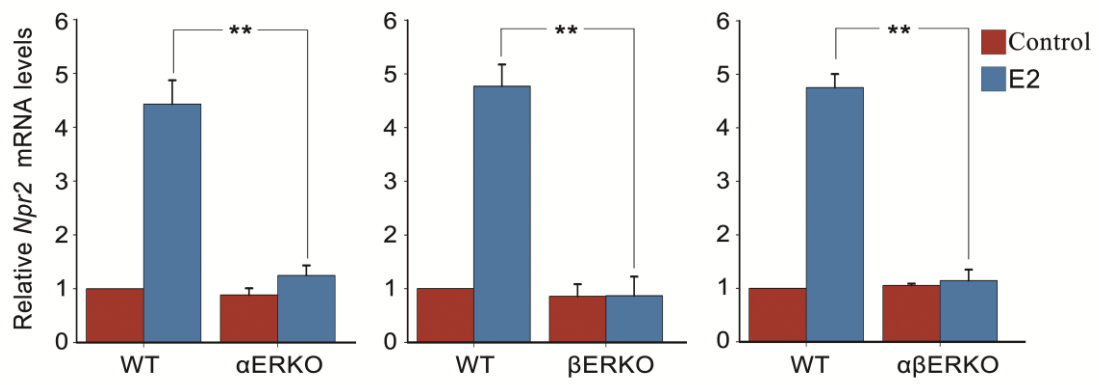

Figure S4

A ER $\beta$

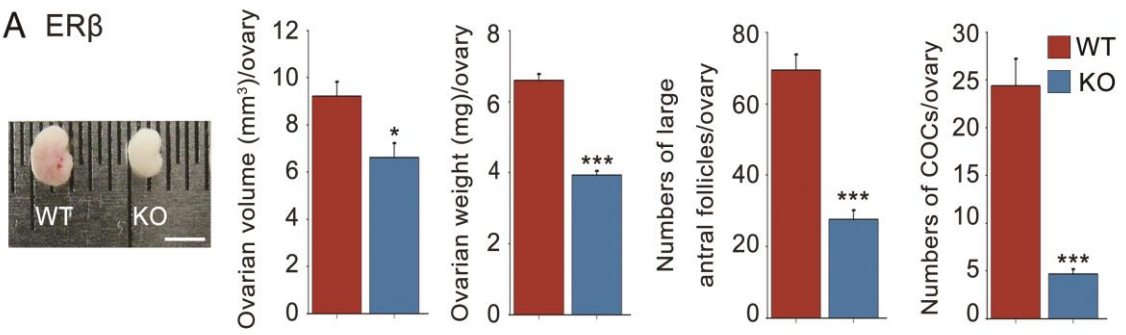

B ER $\alpha$

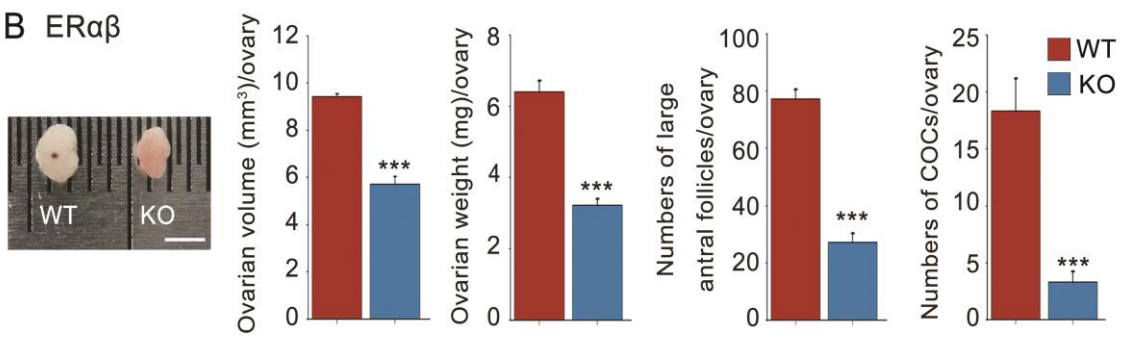



Figure S5

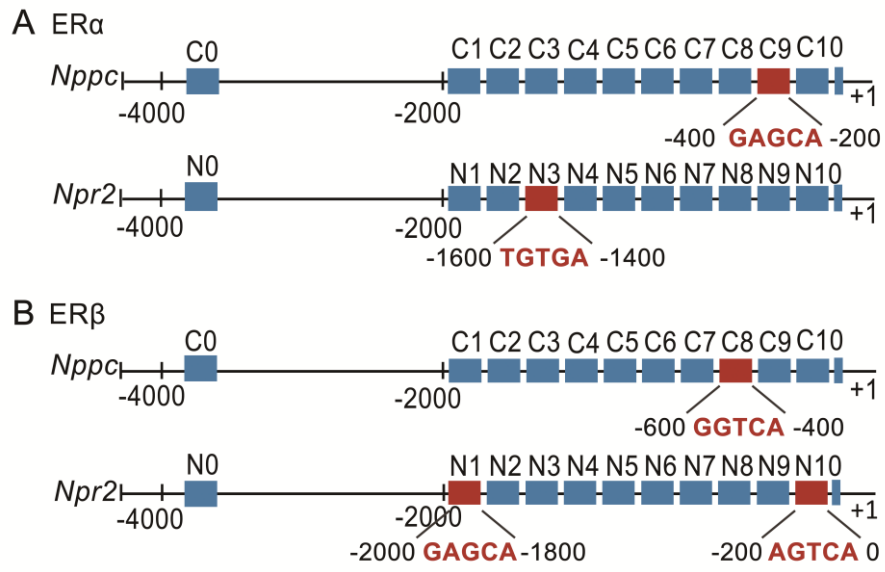

**Figure S6**

**A** COV434 cells

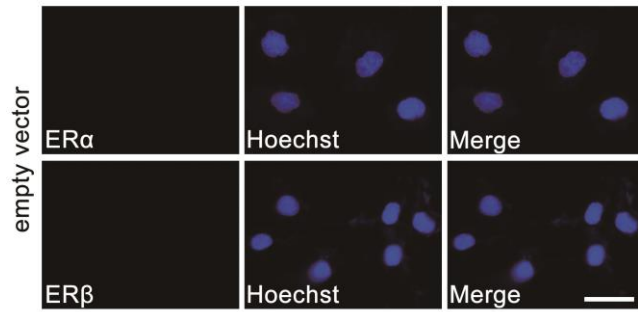

**B** COV434 cells

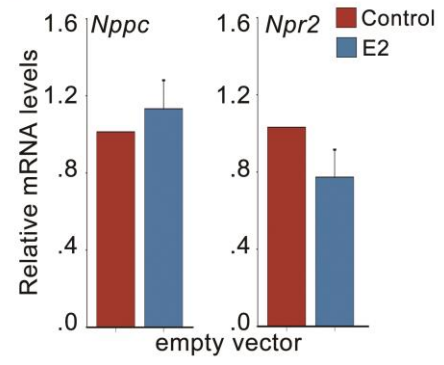

**Figure S7**

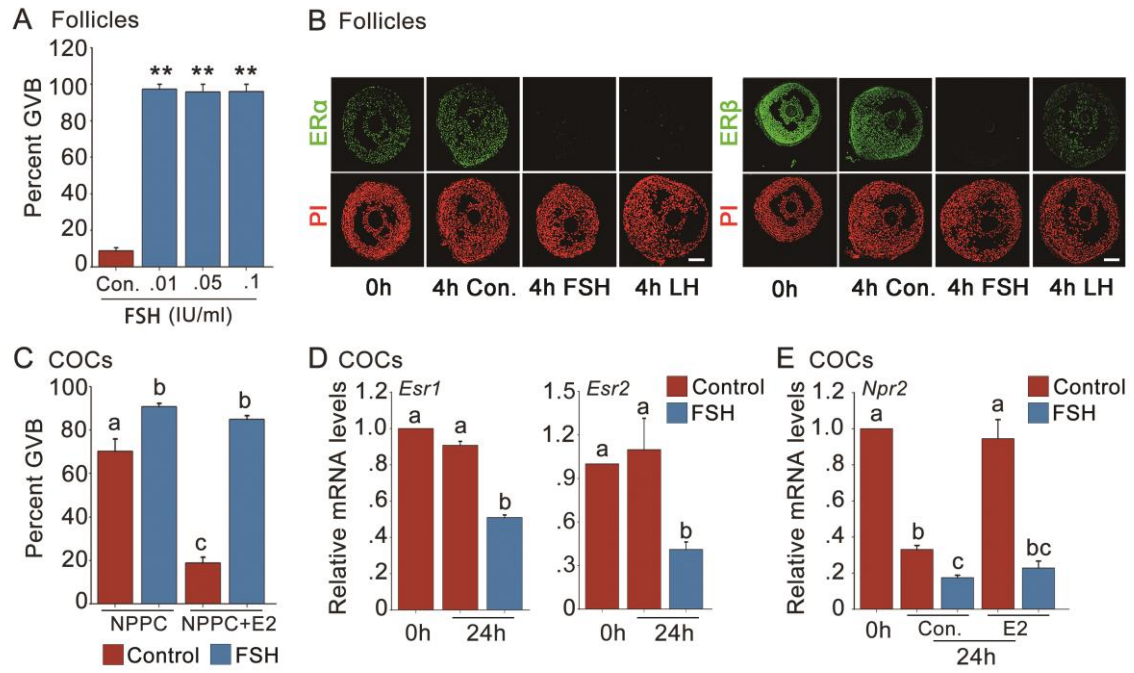

## Supplementary Tables

**Table S1: Primers for RT-qPCR.**

| Genes               | Forward primer (5'-3')  | Reverse primer (5'-3')   |
|---------------------|-------------------------|--------------------------|
| <i>Nppc-Mus</i>     | GGTCTGGGATGTTAGTGCAGCTA | TAAAAGCCACATTGCGTTGGA    |
| <i>Npr2-Mus</i>     | GCTGACCCGCAAGTTCTGT     | ACAATACTCGGTGACAATGCAGAT |
| <i>Esr1-Mus</i>     | AAAGGCGGCATACGAAAGAC    | CTCCTGAAGCACCCATTTTCAT   |
| <i>Esr2-Mus</i>     | CTGTGCCTCTTCTCACAAGGA   | TGCTCCAAGGGTAGGATGGAC    |
| <i>Gapdh-Mus</i>    | GGTGAAGGTCGGTGTGAACG    | CTCGCTCTGGAAGATGGTG      |
| <i>Nppc-Homo</i>    | GCAAATACAAAGGAGCCAACAAG | CATGGAGCCGATTTCGGTCC     |
| <i>Npr2-Homo</i>    | TGACCCCGACCTGCTGTTA     | CGAACCAGGGTACGATAATGG    |
| <i>Esr1-Homo</i>    | CCCCTCAACAGCGTGTCTC     | CGTCGATTATCTGAATTTGGCCT  |
| <i>Esr2-Homo</i>    | AGCACGGCTCCATATACATACC  | TGGACCACTAAAGGAGAAAGGT   |
| <i>β-actin-Homo</i> | CTCACCATGGATGATGATATCGC | AGGAATCCTTCTGACCCATGC    |

**Table S2: Primers for plasmid construction.**

| Genes             | Forward primer (5'-3')          | Reverse primer (5'-3')         |
|-------------------|---------------------------------|--------------------------------|
| <i>Nppc-Mus</i>   | TGAGTCATTCCCAAACGAAAGGCTG       | AGTGCACCGATGTAGCATAGATGACTT    |
| <i>Npr2-1-Mus</i> | ACTTCTCTTCTGGCCCTCTTC           | AAGCAGCCCGAGCTGTCCAATTG        |
| <i>Npr2-2-Mus</i> | GAATGTGTTTATGTGCATGTCC          | TCAGCACCCCGGGCCTCTA            |
| <i>Esr1-Mus</i>   | ATGACCATGACCCTTCACACC           | GATCGTGTGGGGAAGCCCTCTG         |
| <i>Esr2-Mus</i>   | ATGTCCATCTGTGCCTCTTCTCACA       | CTGTGACTGGAGGTTCTGGGAGCC       |
| <i>Esr1-Homo</i>  | CGCGGATCCATGACCATGACCCTCCACACCA | CCGCTCGAG                      |
| <i>Esr2-Homo</i>  | CGCGGATCCATGGATATAAAAACTCACCA   | CCGCTCGAGTCACTGCTCCATCGTTGCTTC |

**Table S3: Primers for the ChIP assay.**

| Genes           | Forward primer (5'-3') | Reverse primer (5'-3') |
|-----------------|------------------------|------------------------|
| <i>Nppc-C0</i>  | GCCAGCAGCTCCTGCCTACC   | CCTTTCCAAGAAGGAGATGG   |
| <i>Nppc-C1</i>  | TCATTTCCCTCGCTCAAGCCT  | GCTATAGGGACCGGGCCACT   |
| <i>Nppc-C2</i>  | CAGAAGGCAACTACAACCCCA  | TGGGAGGTTAGGAGGCAGGTA  |
| <i>Nppc-C3</i>  | GCCTCCTAACCTCCCAACAC   | GCAGAGGATGGGGTTAGTAGA  |
| <i>Nppc-C4</i>  | CGCCCCATGTTTGAGCGTG    | CTCCTGATACGTGTCTGTAC   |
| <i>Nppc-C5</i>  | GCCTCCTAACCTCCCAACAC   | GCCACGGGGGCTCCCTCTTC   |
| <i>Nppc-C6</i>  | CCTCCGGGCCGTCGATTCCG   | AGCAGGATTGCCAAGCGAGC   |
| <i>Nppc-C7</i>  | CAATCCTGCTCCGCATCCGCC  | CGCGACAGCACCCACCTTCGGT |
| <i>Nppc-C8</i>  | TGTCGCGGGGACGCTGGGCT   | GCAGGTCATGCTGGGCACATT  |
| <i>Nppc-C9</i>  | GGCACGGGAAGACAATGGG    | CTGTCCGAGAAAAGAGTGGA   |
| <i>Nppc-C10</i> | GTCCCGAGAACCCCGCCAGG   | CTCGTGCAGAAGGCGGGCCC   |
| <i>Npr2-N0</i>  | ACGGAATTCCTCAAGCTCTGC  | ACTGGATAGCCAGAGACCA    |
| <i>Npr2-N1</i>  | CTCCAGATAAGGGGTACCTGGA | TATTGGATCCATCAGCCATCTG |
| <i>Npr2-N2</i>  | GGCATAAGAGCAGAACGACCGT | TTCTGGGTAGGGAAAACCTCTA |
| <i>Npr2-N3</i>  | TAAATGGATACCCAGTGATTG  | CATACTGTAAGGGCCTTCCTCT |
| <i>Npr2-N4</i>  | TACAGTATGGGGACGCCATGA  | TGTGACTTCCCCGGCAGGCC   |
| <i>Npr2-N5</i>  | CTCGGCCGCCGCCGCGGGCGCA | CATCCGGAGCTGCGGGCGCC   |
| <i>Npr2-N6</i>  | GGACCAGCGCCCGGGCCCGTT  | CAAAGAGCTGCGAGAAGCCAG  |
| <i>Npr2-N7</i>  | CTCTCCCGGCCGATCAGCTGT  | ATAGGGTGGCAGAAGGAAGA   |
| <i>Npr2-N8</i>  | CCTTAGTCCCTGGACCTGGCT  | CTCTGGCCTACTGGGCAGGCA  |
| <i>Npr2-N9</i>  | CGGCCCTGGTTCGGGGGACC   | GTGCCTCCACAGCCAGTGCCA  |
| <i>Npr2-N10</i> | GGCTGTGGAGGCACTGGGCC   | GAGGGGAAGGCGCCAGTGTGA  |

## Supplementary References

1. Murr SM, Geschwind, II, Bradford GE. Plasma LH and FSH during different oestrous cycle conditions in mice. *J Reprod Fertil* 1973, **32**(2): 221-230.
2. Pedersen T, Peters H. Proposal for a classification of oocytes and follicles in the mouse ovary. *J Reprod Fertil* 1968, **17**(3): 555-557.
3. John GB, Shidler MJ, Besmer P, Castrillon DH. Kit signaling via PI3K promotes ovarian follicle maturation but is dispensable for primordial follicle activation. *Dev Biol* 2009, **331**(2): 292-299.
4. Chen C, Cai Q, He W, Li Z, Zhou F, Liu Z, *et al.* An NKX3.1 binding site polymorphism in the I-plastin promoter leads to differential gene expression in human prostate cancer. *International Journal of Cancer* 2016, **138**(1): 74-86.
